# Supplementary material for: Repurposing of Approved Drugs with Potential to Interact with SARS-CoV-2 Receptor
Source: Preprints.org preprint supplement (doi:10.20944/preprints202004.0369.v2), 2020-08-02
Supplement: Supplementary file 1 [file supplementary]

Supplementary table 1: List of drugs and their binding energies to ACE1 and ACE2.

| Ligand                                | Human ACE1                | Human ACE2                |
|---------------------------------------|---------------------------|---------------------------|
|                                       | Binding energy (kcal/mol) | Binding energy (kcal/mol) |
| (S)-NICARDIPINE                       | -8.6                      | -6.0                      |
| (S)-NITRENDIPINE                      | -7.5                      | -6.5                      |
| 17-BETA ESTRADIOL                     | -8.2                      | -5.7                      |
| 4-AMINOPYRIDINE                       | -3.9                      | -4.0                      |
| 4-PHENYLAMINO-3-QUINOLINECARBONITRILE | -8.2                      | -6.5                      |
| ABACAVIR                              | -8.2                      | -6.3                      |
| ABARELIX                              | -6.0                      | -4.4                      |
| ABEMACICLIB                           | -9.1                      | -6.7                      |
| ABIRATERONE ACETATE                   | -9.8                      | -7.0                      |
| ACALABRUTINIB                         | -9.6                      | -7.2                      |
| ACAMPROSATE                           | -5.7                      | -4.5                      |
| ACARBOSE                              | -8.2                      | -6.0                      |
| ACEBUTOLOL                            | -7.3                      | -5.6                      |
| ACETAMINOPHEN                         | -5.5                      | -5.6                      |
| ACETAZOLAMIDE                         | -6.2                      | -5.1                      |
| ACETOHEXAMIDE                         | -8.6                      | -6.3                      |
| ACETOHYDROXAMIC ACID                  | -3.9                      | -3.5                      |
| ACETOPHENAZINE                        | -8.0                      | -6.2                      |
| ACETYLCHOLINE                         | -4.3                      | -3.5                      |
| ACETYLCYSTEINE                        | -4.7                      | -3.9                      |
| ACETYLDIGITOXIN                       | -10.0                     | -7.1                      |
| ACRISORCIN                            | -5.9                      | -5.8                      |
| ACYCLOVIR                             | -6.7                      | -5.2                      |
| ADAPALENE                             | -9.2                      | -7.3                      |
| ADEFOVIR DIPIVOXIL                    | -7.6                      | -4.8                      |
| ADENOSINE                             | -7.0                      | -5.5                      |
| ALATROFLOXACIN                        | -10.6                     | -6.4                      |
| ALBENDAZOLE                           | -6.9                      | -5.2                      |
| ALBUTEROL                             | -6.6                      | -5.2                      |
| ALCAFTADINE                           | -9.0                      | -5.8                      |
| ALCLOMETASONE DIPROPIONATE            | -8.6                      | -6.5                      |
| ALFENTANIL                            | -7.4                      | -4.9                      |
| ALFUZOSIN                             | -7.7                      | -5.6                      |
| ALISKIREN                             | -7.5                      | -5.9                      |
| ALITRETINOIN                          | -7.4                      | -5.6                      |
| ALLOPURINOL                           | -5.6                      | -5.1                      |
| ALMOTRIPTAN                           | -7.0                      | -6.0                      |

|                          |       |      |
|--------------------------|-------|------|
| ALOSETRON                | -8.3  | -6.4 |
| ALPELISIB                | -8.7  | -6.6 |
| ALPHA-TOCOPHEROL         | -7.4  | -5.8 |
| ALPHA-TOCOPHEROL ACETATE | -7.8  | -5.6 |
| ALPRAZOLAM               | -8.6  | -5.9 |
| ALPROSTADIL              | -6.2  | -5.3 |
| ALTRETAMINE              | -5.1  | -4.1 |
| ALVIMOPAN                | -8.3  | -6.4 |
| AMANTADINE               | -5.5  | -4.6 |
| AMBENONIUM               | -7.6  | -5.5 |
| AMBRISENTAN              | -7.8  | -5.2 |
| AMCINONIDE               | -10.7 | -7.4 |
| AMDINOCILLIN             | -7.1  | -5.8 |
| AMIFAMPRIDINE            | -4.1  | -4.2 |
| AMIFOSTINE               | -4.8  | -3.8 |
| AMIKACIN                 | -7.2  | -5.4 |
| AMILORIDE                | -6.4  | -5.9 |
| AMINOCAPROIC ACID        | -4.9  | -4.4 |
| AMINOGLUTETHIMIDE        | -7.4  | -5.7 |
| AMINOLEVULINIC ACID      | -4.7  | -5.3 |
| AMINOMETHYLBENZOIC ACID  | -6.4  | -3.9 |
| AMINOPTERIN              | -9.0  | -5.1 |
| AMINOSALICYLIC ACID      | -6.1  | -5.4 |
| AMIODARONE               | -7.4  | -5.8 |
| AMITRIPTYLINE            | -7.7  | -6.7 |
| AMLEXANOX                | -8.7  | -4.4 |
| AMLODIPINE               | -6.7  | -4.2 |
| AMODIAQUINE              | -7.5  | -6.9 |
| AMOXAPINE                | -8.8  | -5.5 |
| AMOXICILLIN              | -8.2  | -6.2 |
| AMPHETAMINE              | -5.3  | -5.2 |
| AMPHOTERICIN B           | -7.1  | -6.0 |
| AMPICILLIN               | -8.1  | -5.8 |
| AMPRENAVIR               | -7.5  | -5.1 |
| ANAGRELIDE               | -7.2  | -5.7 |
| ANASTROZOLE              | -8.0  | -6.0 |
| ANGIOTENSIN II           | -9.5  | -6.1 |
| ANIDULAFUNGIN            | -6.6  | -5.7 |
| ANILERIDINE              | -8.3  | -6.0 |
| ANISINDIONE              | -7.5  | -5.5 |
| ANTAZOLINE               | -7.4  | -5.1 |

|                             |       |      |
|-----------------------------|-------|------|
| APALUTAMIDE                 | -10.1 | -6.8 |
| APOMORPHINE                 | -8.1  | -5.8 |
| APRACLONIDINE               | -6.5  | -5.5 |
| APREPITANT                  | -8.3  | -6.3 |
| ARBUTAMINE                  | -7.6  | -5.9 |
| ARFORMOTEROL                | -7.4  | -6.3 |
| ARGATROBAN                  | -9.4  | -6.0 |
| ARIPIRAZOLE                 | -8.8  | -6.5 |
| ARTEMETHER                  | -8.4  | -5.4 |
| ASCORBIC ACID               | -5.9  | -4.8 |
| ASENAPINE                   | -8.3  | -6.0 |
| ASPIRIN                     | -6.1  | -4.6 |
| ATAZANAVIR                  | -8.5  | -6.4 |
| ATENOLOL                    | -6.0  | -5.3 |
| ATOVAQUONE                  | -8.9  | -6.8 |
| ATROPINE                    | -6.9  | -5.2 |
| AVATROMBOPAG                | -6.9  | -7.4 |
| AXITINIB                    | -9.3  | -7.0 |
| AZACITIDINE                 | -6.6  | -5.1 |
| AZATADINE                   | -8.0  | -6.0 |
| AZATHIOPRINE                | -6.5  | -5.1 |
| AZELAIC ACID                | -5.2  | -4.1 |
| AZELASTINE                  | -9.0  | -6.6 |
| AZILSARTAN KAMEDOXOMIL      | -9.6  | -6.4 |
| AZITHROMYCIN                | -6.6  | -5.5 |
| AZLOCILLIN                  | -9.4  | -6.7 |
| AZTREONAM                   | -7.7  | -6.2 |
| BACAMPICILLIN               | -7.7  | -5.6 |
| BACITRACIN                  | -5.3  | -4.0 |
| BACLOFEN                    | -6.0  | -6.3 |
| BALOXAVIR                   | -9.0  | -6.4 |
| BALOXAVIR MARBOXIL          | -8.6  | -6.4 |
| BALSALAZIDE                 | -8.2  | -6.6 |
| BARICITINIB                 | -8.4  | -5.6 |
| BECLOMETHASONE DIPROPIONATE | -7.8  | -6.6 |
| BENAZEPRIL                  | -7.5  | -5.9 |
| BENDROFLUMETHIAZIDE         | -8.4  | -6.1 |
| BENZHYDROCODONE             | -9.0  | -7.0 |
| BENZNIDAZOLE                | -7.9  | -6.3 |
| BENZONATATE                 | -5.9  | -4.8 |
| BENZOYL PEROXIDE            | -6.9  | -6.5 |

|                            |       |      |
|----------------------------|-------|------|
| BENZPHETAMINE              | -6.1  | -5.7 |
| BENZQUINAMIDE              | -7.5  | -5.7 |
| BENZTHIAZIDE               | -8.4  | -6.3 |
| BENZTROPINE                | -7.8  | -5.3 |
| BENZYL ALCOHOL             | -5.0  | -4.8 |
| BENZYL BENZOATE            | -6.3  | -6.2 |
| BEPOTASTINE                | -8.4  | -6.0 |
| BEPRIDIL                   | -7.1  | -4.7 |
| BESIFLOXACIN               | -8.6  | -5.6 |
| BETAINE                    | -4.0  | -3.2 |
| BETAMETHASONE              | -9.3  | -6.4 |
| BETAMETHASONE ACETATE      | -9.2  | -6.5 |
| BETAMETHASONE BENZOATE     | -10.8 | -6.5 |
| BETAMETHASONE DIPROPIONATE | -8.8  | -5.5 |
| BETAMETHASONE PHOSPHATE    | -8.6  | -6.6 |
| BETAMETHASONE VALERATE     | -9.7  | -5.7 |
| BETAXOLOL                  | -6.6  | -5.2 |
| BETAZOLE                   | -4.4  | -4.6 |
| BETHANECHOL                | -4.5  | -3.8 |
| BETRIXABAN                 | -8.5  | -6.5 |
| BEXAROTENE                 | -9.2  | -6.4 |
| BICALUTAMIDE               | -8.9  | -7.0 |
| BICTEGRAVIR                | -9.7  | -7.8 |
| BIMATOPROST                | -7.6  | -6.2 |
| BINIMETINIB                | -7.6  | -5.5 |
| BIOTIN                     | -6.4  | -5.5 |
| BIPERIDEN                  | -8.0  | -6.1 |
| BISOPROLOL                 | -6.1  | -5.1 |
| BISPHOSPHONATE             | -5.8  | -5.5 |
| BITOLTEROL                 | -8.1  | -5.7 |
| BLEOMYCIN                  | -4.1  | -4.7 |
| BMS-354825                 | -8.6  | -6.5 |
| BOCEPREVIR                 | -8.1  | -5.4 |
| BOSENTAN                   | -8.4  | -5.2 |
| BREXANOLONE                | -8.5  | -6.0 |
| BRIGATINIB                 | -8.8  | -6.4 |
| BRIMONIDINE                | -7.2  | -5.2 |
| BRINZOLAMIDE               | -7.2  | -4.9 |
| BROMFENAC                  | -7.8  | -5.7 |
| BROMODIPHENHYDRAMINE       | -6.8  | -4.7 |
| BROMPHENIRAMINE            | -7.0  | -6.2 |

|                       |      |      |
|-----------------------|------|------|
| BRZ                   | -7.4 | -4.9 |
| BUCLIZINE             | -8.9 | -6.1 |
| BUDESONIDE            | -9.7 | -6.2 |
| BUMETANIDE            | -7.5 | -5.2 |
| BUPIVACAINE           | -7.0 | -5.9 |
| BUPRENORPHINE         | -7.6 | -5.9 |
| BUPROPION             | -6.5 | -5.2 |
| BUSPIRONE             | -8.7 | -7.2 |
| BUSULFAN              | -5.7 | -4.5 |
| BUTABARBITAL          | -6.5 | -4.8 |
| BUTALBITAL            | -6.6 | -4.7 |
| BUTENAFINE            | -7.4 | -6.1 |
| BUTOCONAZOLE          | -6.6 | -4.8 |
| BUTORPHANOL           | -7.6 | -6.2 |
| CABAZITAXEL           | -5.9 | -5.9 |
| CAFFEINE              | -6.0 | -4.9 |
| CALCIFEDIOL           | -8.6 | -6.2 |
| CALCIPOTRIENE         | -8.7 | -6.7 |
| CANDESARTAN CILEXETIL | -8.9 | -6.7 |
| CANDICIDIN            | -6.0 | -6.3 |
| CANNABIDIOL           | -7.4 | -5.3 |
| CAPECITABINE          | -7.4 | -6.1 |
| CAPREOMYCIN           | -8.8 | -6.4 |
| CAPSAICIN             | -7.3 | -5.8 |
| CAPTOPRIL             | -5.6 | -4.2 |
| CARBACHOL             | -4.7 | -3.7 |
| CARBAMAZEPINE         | -7.9 | -7.7 |
| CARBENICILLIN         | -8.3 | -6.1 |
| CARBENICILLIN INDANYL | -9.4 | -7.1 |
| CARBIDOPA             | -6.9 | -5.7 |
| CARBINOXAMINE         | -6.7 | -5.9 |
| CARGLUMIC ACID        | -5.9 | -5.2 |
| CARISOPRODOL          | -6.1 | -5.4 |
| CARMUSTINE            | -5.0 | -4.3 |
| CARPHENAZINE          | -7.8 | -5.6 |
| CARPROFEN             | -8.1 | -6.0 |
| CARTEOLOL             | -7.6 | -5.3 |
| CARVEDILOL            | -8.4 | -6.1 |
| CEFACLOR              | -7.8 | -5.8 |
| CEFADROXIL            | -8.0 | -6.4 |
| CEFAMANDOLE NAFATE    | -8.3 | -6.3 |

|                           |      |      |
|---------------------------|------|------|
| CEFAZOLIN                 | -8.2 | -6.4 |
| CEFDINIR                  | -7.8 | -6.1 |
| CEFDITOREN PIVOXIL        | -8.4 | -6.4 |
| CEFIXIME                  | -7.3 | -6.4 |
| CEFMENOXIME               | -7.7 | -6.7 |
| CEFMETAZOLE               | -7.4 | -6.0 |
| CEFONICID                 | -7.4 | -7.1 |
| CEFOPERAZONE              | -9.8 | -6.5 |
| CEFORANIDE                | -7.8 | -6.9 |
| CEFOTAXIME                | -7.4 | -5.9 |
| CEFOTETAN                 | -8.0 | -6.4 |
| CEFOTIAM                  | -7.7 | -5.8 |
| CEFOXITIN                 | -7.1 | -5.5 |
| CEFPIRAMIDE               | -9.8 | -6.8 |
| CEFPODOXIME PROXETIL      | -8.0 | -5.8 |
| CEFPROZIL                 | -8.3 | -6.0 |
| CEFTAROLINE               | -8.6 | -7.1 |
| CEFTAZIDIME               | -7.9 | -6.4 |
| CEFTIBUTEN                | -7.4 | -6.2 |
| CEFTIZOXIME               | -7.6 | -6.0 |
| CEFTRIAZONE               | -8.4 | -7.0 |
| CEFUROXIME                | -7.5 | -6.2 |
| CEFUROXIME AXETIL         | -8.0 | -5.9 |
| CELECOXIB                 | -8.3 | -6.5 |
| CEPHALEXIN                | -8.0 | -5.9 |
| CEPHALOGLYCIN             | -8.1 | -6.0 |
| CEPHALOTHIN               | -7.3 | -5.8 |
| CEPHAPIRIN                | -7.8 | -6.0 |
| CEPHRADINE                | -8.0 | -5.9 |
| CERIVASTATIN              | -7.3 | -5.6 |
| CERULETIDE                | -6.2 | -6.2 |
| CETIRIZINE                | -7.4 | -5.1 |
| CETRORELIX                | -9.1 | -6.2 |
| CEVIMELINE                | -5.8 | -4.4 |
| CHENODIOL                 | -8.4 | -6.0 |
| CHLOPHEDIANOL             | -7.0 | -4.8 |
| CHLORAMBUCIL              | -6.3 | -4.5 |
| CHLORAMPHENICOL           | -7.0 | -5.4 |
| CHLORAMPHENICOL PALMITATE | -7.4 | -4.8 |
| CHLORDIAZEPOXIDE          | -7.5 | -5.4 |
| CHLORHEXIDINE             | -9.5 | -6.9 |

|                         |       |      |
|-------------------------|-------|------|
| CHLORMEZANONE           | -6.8  | -5.1 |
| CHLOROPROCAINE          | -6.5  | -5.1 |
| CHLOROQUINE             | -6.7  | -4.9 |
| CHLOROTHIAZIDE          | -7.0  | -5.3 |
| CHLOROTRIANISENE        | -7.7  | -5.7 |
| CHLOROXINE              | -6.4  | -5.4 |
| CHLORPHENESIN CARBAMATE | -6.2  | -5.1 |
| CHLORPHENIRAMINE        | -7.0  | -5.7 |
| CHLORPHENTERMINE        | -5.5  | -4.8 |
| CHLORPROMAZINE          | -7.0  | -5.0 |
| CHLORPROPAMIDE          | -6.6  | -6.0 |
| CHLORTETRACYCLINE       | -8.3  | -6.5 |
| CHLORTHALIDONE          | -8.0  | -6.6 |
| CHLORZOAZONE            | -6.6  | -5.5 |
| CICLESONIDE             | -10.4 | -7.0 |
| CICLOPIROX              | -6.8  | -6.8 |
| CIDOFOVIR               | -6.4  | -5.6 |
| CILASTATIN              | -6.4  | -5.5 |
| CILOSTAZOL              | -9.0  | -6.5 |
| CIMETIDINE              | -6.4  | -4.9 |
| CINACALCET              | -7.0  | -5.3 |
| CINOXACIN               | -6.8  | -5.4 |
| CIPROFLOXACIN           | -8.1  | -5.8 |
| CISATRACURIUM           | -7.4  | -4.1 |
| CITALOPRAM              | -7.8  | -5.5 |
| CLADRIBINE              | -7.2  | -6.4 |
| CLARITHROMYCIN          | -8.3  | -4.8 |
| CLAVULANATE             | -6.5  | -5.1 |
| CLEMASTINE              | -7.4  | -5.0 |
| CLIDINIUM               | -7.7  | -6.3 |
| CLINDAMYCIN             | -6.8  | -5.7 |
| CLINDAMYCIN PALMITATE   | -7.1  | -5.0 |
| CLINDAMYCIN PHOSPHATE   | -5.6  | -5.2 |
| CLIOQUINOL              | -6.5  | -5.8 |
| CLOBAZAM                | -7.9  | -5.7 |
| CLOBETASOL PROPIONATE   | -9.8  | -6.5 |
| CLOCORTOLONE PIVALATE   | -8.5  | -7.3 |
| CLOFAZIMINE             | -9.3  | -6.4 |
| CLOFIBRATE              | -6.1  | -4.6 |
| CLOMIPRAMINE            | -7.8  | -5.1 |
| CLONAZEPAM              | -8.0  | -5.9 |

|                       |       |      |
|-----------------------|-------|------|
| CLONIDINE             | -6.4  | -5.0 |
| CLOPIDOGREL           | -7.5  | -5.4 |
| CLORAZEPATE           | -8.1  | -6.1 |
| CLOTRIMAZOLE          | -7.4  | -5.2 |
| CLOXACILLIN           | -8.4  | -6.7 |
| CLOZAPINE             | -8.3  | -6.1 |
| COCAINE               | -7.2  | -5.8 |
| CODEINE               | -7.7  | -5.9 |
| COLCHICINE            | -8.0  | -5.2 |
| COLFOSCERIL PALMITATE | -6.2  | -4.3 |
| COLISTIMETHATE        | -5.6  | -3.6 |
| COLISTIN              | -5.5  | -4.8 |
| CONIVAPTAN            | -10.2 | -7.8 |
| COPANLISIB            | -9.0  | -6.8 |
| CORTISONE ACETATE     | -8.7  | -6.6 |
| CRIZOTINIB            | -9.1  | -7.3 |
| CROMOLYN              | -8.7  | -7.1 |
| CROTAMITON            | -6.2  | -4.5 |
| CYCLACILLIN           | -7.3  | -5.9 |
| CYCLIZINE             | -7.7  | -5.5 |
| CYCLOBENZAPRINE       | -8.2  | -5.5 |
| CYCLOPENTOLATE        | -6.8  | -4.8 |
| CYCLOPHOSPHAMIDE      | -5.2  | -4.1 |
| CYCLOSPORINE          | -5.1  | -4.5 |
| CYCLOTHIAZIDE         | -9.1  | -6.0 |
| CYCRIMINE             | -7.6  | -6.8 |
| CYPROHEPTADINE        | -9.4  | -6.0 |
| CYSTEAMINE            | -2.6  | -2.2 |
| CYTARABINE            | -6.4  | -4.9 |
| DABIGATRAN ETEXILATE  | -8.9  | -5.7 |
| DACARBAZINE           | -5.8  | -5.4 |
| DACOMITINIB           | -9.9  | -6.7 |
| DACTINOMYCIN          | -7.7  | -4.2 |
| DALFAMPRIDINE         | -3.9  | -4.0 |
| DALFOPRISTIN          | -9.0  | -6.8 |
| DANAZOL               | -9.1  | -7.1 |
| DANTROLENE            | -8.4  | -6.4 |
| DAPIPRAZOLE           | -8.2  | -6.8 |
| DAPSONE               | -7.4  | -5.4 |
| DAPTOMYCIN            | -4.3  | -3.5 |
| DARIFENACIN           | -9.5  | -6.7 |

|                               |      |      |
|-------------------------------|------|------|
| DARUNAVIR                     | -8.8 | -5.4 |
| DASATINIB                     | -8.9 | -6.6 |
| DAUNORUBICIN                  | -9.8 | -6.2 |
| DECITABINE                    | -6.5 | -5.9 |
| DEFERASIROX                   | -9.4 | -7.1 |
| DEFERIPRONE                   | -5.4 | -4.6 |
| DEFEROXAMINE                  | -7.1 | -6.3 |
| DEFLAZACORT                   | -9.3 | -6.9 |
| DEGARELIX                     | -4.8 | -5.2 |
| DELAFLOXACIN                  | -8.6 | -6.5 |
| DELAVIRDINE                   | -8.6 | -6.6 |
| DEMECARIUM                    | -8.0 | -5.3 |
| DEMECLOCYCLINE                | -8.3 | -6.3 |
| DESERPIDINE                   | -9.0 | -6.6 |
| DESFLURANE                    | -4.9 | -4.7 |
| DESIPRAMINE                   | -7.4 | -5.5 |
| DESLANOSIDE                   | -7.5 | -7.9 |
| DESLORATADINE                 | -8.3 | -6.0 |
| DESOGESTREL                   | -7.9 | -5.7 |
| DESONIDE                      | -9.9 | -6.6 |
| DESOXIMETASONE                | -9.6 | -6.4 |
| DESOXYCORTICOSTERONE ACETATE  | -8.3 | -6.7 |
| DESOXYCORTICOSTERONE PIVALATE | -8.6 | -6.8 |
| DESVENLAFAXINE                | -6.9 | -5.2 |
| DEXAMETHASONE                 | -9.3 | -6.6 |
| DEXBROMPHENIRAMINE            | -6.9 | -4.8 |
| DEXCHLORPHENIRAMINE           | -6.9 | -6.0 |
| DEXMEDETOMIDINE               | -6.5 | -4.9 |
| DEXMETHYLPHENIDATE            | -6.8 | -5.3 |
| DEXPANTHENOL                  | -5.3 | -4.3 |
| DEXRAZOXANE                   | -7.0 | -6.2 |
| DEXTROTHYROXINE               | -6.3 | -5.2 |
| DEZOCINE                      | -8.8 | -5.6 |
| DIAZEPAM                      | -7.9 | -5.8 |
| DIAZOXIDE                     | -6.7 | -5.1 |
| DIBUCAINE                     | -7.5 | -5.6 |
| DICHLORPHENAMIDE              | -7.0 | -4.7 |
| DICLOFENAC                    | -6.9 | -6.0 |
| DICLOXACILLIN                 | -8.1 | -6.1 |
| DICUMAROL                     | -8.5 | -6.4 |
| DICYCLOMINE                   | -6.5 | -5.1 |

|                       |       |      |
|-----------------------|-------|------|
| DIDANOSINE            | -7.2  | -5.7 |
| DIENESTROL            | -7.3  | -5.5 |
| DIENOGEST             | -8.5  | -6.7 |
| DIETHYLCARBAMAZINE    | -5.2  | -3.9 |
| DIETHYLPROPION        | -6.2  | -4.3 |
| DIETHYLSTILBESTROL    | -6.9  | -5.5 |
| DIFENOXIN             | -9.0  | -6.6 |
| DIFLORASONE DIACETATE | -8.4  | -6.5 |
| DIFLUNISAL            | -7.7  | -6.3 |
| DIFLUPREDNATE         | -8.9  | -6.4 |
| DIGITOXIN             | -11.2 | -8.0 |
| DIGOXIN               | -7.7  | -7.4 |
| DIHYDROCODEINE        | -7.3  | -5.8 |
| DIHYDROERGOTAMINE     | -12.7 | -7.4 |
| DILTIAZEM             | -7.1  | -4.9 |
| DIMENHYDRINATE        | -6.2  | -4.7 |
| DIMERCAPROL           | -3.1  | -2.7 |
| DINOPROST             | -7.0  | -5.0 |
| DINOPROSTONE          | -6.7  | -4.5 |
| DIPHEMANIL            | -8.0  | -6.1 |
| DIPHENHYDRAMINE       | -6.8  | -4.5 |
| DIPHENIDOL            | -7.2  | -5.1 |
| DIPHENOXYLATE         | -8.4  | -6.5 |
| DIPHENYLPYRALINE      | -7.5  | -7.0 |
| DIPIVEFRIN            | -7.4  | -5.5 |
| DIPYRIDAMOLE          | -7.0  | -4.6 |
| DISOPYRAMIDE          | -7.2  | -5.1 |
| DISULFIRAM            | -4.6  | -3.5 |
| DOCETAXEL             | -9.4  | -6.5 |
| DOCOSANOL             | -5.5  | -3.8 |
| DOFETILIDE            | -7.6  | -5.9 |
| DOLASETRON            | -8.6  | -6.2 |
| DONEPEZIL             | -9.1  | -6.9 |
| DOPAMINE              | -5.9  | -5.3 |
| DORAVIRINE            | -8.5  | -6.5 |
| DORIPENEM             | -7.8  | -6.5 |
| DORZOLAMIDE           | -7.1  | -5.6 |
| DOXACURIUM            | -7.1  | -5.0 |
| DOXAPRAM              | -8.0  | -5.3 |
| DOXAZOSIN             | -9.6  | -6.7 |
| DOXEPIN               | -8.1  | -5.3 |

|                           |       |      |
|---------------------------|-------|------|
| DOXERCALCIFEROL           | -9.5  | -6.7 |
| DOXORUBICIN               | -9.3  | -6.0 |
| DOXYCYCLINE               | -8.4  | -6.5 |
| DOXYLAMINE                | -6.5  | -4.7 |
| DROMOSTANOLONE PROPIONATE | -8.7  | -6.6 |
| DRONABINOL                | -8.2  | -5.8 |
| DRONEDARONE               | -8.0  | -5.4 |
| DROPERIDOL                | -9.6  | -6.8 |
| DROSPIRENONE              | -10.6 | -6.9 |
| DULOXETINE                | -6.8  | -6.6 |
| DUTASTERIDE               | -10.2 | -7.1 |
| DUVELISIB                 | -9.3  | -6.7 |
| DYCLONINE                 | -6.9  | -5.4 |
| DYDROGESTERONE            | -8.6  | -6.4 |
| DYPHYLLINE                | -6.6  | -5.4 |
| ECHOTHIOPHATE             | -4.6  | -3.8 |
| ECONAZOLE                 | -7.9  | -6.0 |
| EDARAVONE                 | -6.4  | -5.9 |
| EDROPHONIUM               | -5.9  | -4.1 |
| EFAVIRENZ                 | -7.2  | -5.2 |
| EFLORNITHINE              | -4.9  | -4.5 |
| ELAGOLIX                  | -8.7  | -5.9 |
| ELETRIPTAN                | -8.0  | -6.8 |
| EMEDASTINE                | -7.0  | -5.3 |
| EMTRICITABINE             | -6.4  | -4.9 |
| ENALAPRIL                 | -7.7  | -6.0 |
| ENALAPRILAT               | -7.7  | -6.5 |
| ENASIDENIB                | -9.1  | -7.2 |
| ENCORAFENIB               | -8.4  | -7.1 |
| ENFLURANE                 | -4.9  | -4.7 |
| ENOXACIN                  | -8.0  | -5.6 |
| ENTACAPONE                | -7.2  | -5.9 |
| ENTECAVIR                 | -7.3  | -6.0 |
| EPINASTINE                | -8.8  | -5.9 |
| EPINEPHRINE               | -6.0  | -5.2 |
| EPIRUBICIN                | -8.4  | -5.7 |
| EPOPROSTENOL              | -7.5  | -5.3 |
| EPROSARTAN                | -7.5  | -5.7 |
| EPTIFIBATIDE              | -7.4  | -6.6 |
| EQUILIN                   | -8.5  | -7.0 |
| ERAVACYCLINE              | -8.7  | -6.7 |

|                             |       |      |
|-----------------------------|-------|------|
| ERDAFITINIB                 | -8.1  | -5.7 |
| ERGOCALCIFEROL              | -9.6  | -6.4 |
| ERIBULIN                    | -10.3 | -7.8 |
| ERLOTINIB                   | -7.9  | -6.4 |
| ERTAPENEM                   | -9.1  | -6.6 |
| ERTUGLIFLOZIN               | -8.2  | -6.7 |
| ERYTHROMYCIN                | -8.4  | -5.2 |
| ERYTHROMYCIN ESTOLATE       | -8.5  | -5.1 |
| ERYTHROMYCIN ETHYLSUCCINATE | -8.9  | -5.1 |
| ESCITALOPRAM                | -7.5  | -5.5 |
| ESKETAMINE                  | -6.3  | -5.9 |
| ESMOLOL                     | -6.5  | -5.1 |
| ESTAZOLAM                   | -8.0  | -5.8 |
| ESTRADIOL                   | -8.2  | -6.3 |
| ESTRADIOL CYPIONATE         | -9.6  | -7.3 |
| ESTRADIOL VALERATE          | -8.6  | -6.0 |
| ESTRAMUSTINE PHOSPHATE      | -7.9  | -6.2 |
| ESTRONE                     | -8.5  | -6.1 |
| ESTROPIPATE                 | -9.1  | -6.5 |
| ESZOPICLONE                 | -8.3  | -5.9 |
| ETELCALCETIDE               | -8.0  | -5.7 |
| ETHAMBUTOL                  | -4.8  | -3.8 |
| ETHCHLORVYNOL               | -5.0  | -4.7 |
| ETHINAMATE                  | -6.4  | -5.4 |
| ETHINYL ESTRADIOL           | -8.6  | -6.5 |
| ETHIONAMIDE                 | -5.4  | -5.2 |
| ETHOPROPAZINE               | -7.0  | -4.8 |
| ETHOSUXIMIDE                | -5.7  | -4.8 |
| ETHOTOIN                    | -6.5  | -5.8 |
| ETHOXZOLAMIDE               | -6.4  | -5.4 |
| ETHYLESTRENOL               | -7.8  | -6.2 |
| ETHYNODIOL DIACETATE        | -8.2  | -6.4 |
| ETIDOCAINE                  | -6.4  | -4.8 |
| ETIDRONATE                  | -5.4  | -4.2 |
| ETODOLAC                    | -7.1  | -5.4 |
| ETOMIDATE                   | -6.9  | -5.7 |
| ETONOGESTREL                | -8.5  | -5.7 |
| ETOPOSIDE                   | -9.6  | -6.4 |
| ETOPOSIDE PHOSPHATE         | -8.8  | -6.1 |
| ETRETINATE                  | -7.7  | -5.9 |
| EXEMESTANE                  | -8.5  | -5.9 |

|                         |       |      |
|-------------------------|-------|------|
| EZETIMIBE               | -8.2  | -6.0 |
| EZOABINE                | -7.5  | -6.0 |
| FAMCICLOVIR             | -7.1  | -5.0 |
| FAMOTIDINE              | -6.5  | -5.8 |
| FELBAMATE               | -6.7  | -6.3 |
| FELODIPINE              | -6.9  | -4.8 |
| FENOFIBRATE             | -8.1  | -6.2 |
| FENOFIBRIC ACID         | -7.9  | -6.8 |
| FENOLDOPAM              | -7.9  | -5.7 |
| FENOPROFEN              | -7.3  | -5.9 |
| FENTANYL                | -8.0  | -5.8 |
| FESOTERODINE            | -7.2  | -5.4 |
| FEXOFENADINE            | -9.2  | -6.2 |
| FINASTERIDE             | -8.5  | -6.1 |
| FINGOLIMOD              | -6.7  | -4.6 |
| FLAVOXATE               | -8.9  | -6.7 |
| FLECAINIDE              | -8.1  | -6.1 |
| FLOXURIDINE             | -6.7  | -5.1 |
| FLUCONAZOLE             | -7.6  | -6.3 |
| FLUCYTOSINE             | -5.1  | -4.6 |
| FLUDARABINE PHOSPHATE   | -7.2  | -5.7 |
| FLUDROCORTISONE ACETATE | -8.7  | -7.0 |
| FLUMAZENIL              | -7.9  | -5.6 |
| FLUNISOLIDE             | -9.6  | -6.3 |
| FLUOCINONIDE            | -9.6  | -7.5 |
| FLUOROMETHOLONE         | -8.9  | -6.6 |
| FLUOROURACIL            | -5.1  | -4.5 |
| FLUOXETINE              | -7.5  | -6.7 |
| FLUOXYMESTERONE         | -8.9  | -6.7 |
| FLUPHENAZINE            | -8.0  | -5.9 |
| FLUPREDNISOLONE         | -9.0  | -6.4 |
| FLURAZEPAM              | -7.9  | -5.4 |
| FLURBIPROFEN            | -7.8  | -5.6 |
| FLUTAMIDE               | -7.1  | -5.7 |
| FLUTICASONE FUROATE     | -10.0 | -6.3 |
| FLUTICASONE PROPIONATE  | -8.9  | -6.4 |
| FLUVASTATIN             | -7.9  | -5.8 |
| FLUVOXAMINE             | -6.7  | -4.9 |
| FOLIC_ACID              | -8.9  | -6.9 |
| FOMEPIZOLE              | -4.0  | -3.8 |
| FONDAPARINUX            | -5.8  | -4.4 |

|                       |       |      |
|-----------------------|-------|------|
| FORMOTEROL            | -7.5  | -5.7 |
| FOSAPREPITANT         | -9.3  | -7.0 |
| FOSCARNET             | -4.5  | -3.6 |
| FOSFOMYCIN            | -4.7  | -3.5 |
| FOSINOPRIL            | -7.2  | -6.2 |
| FOSNETUPITANT         | -9.9  | -6.2 |
| FOSPHENYTOIN          | -8.7  | -6.6 |
| FOSTAMATINIB          | -9.1  | -7.1 |
| FROVATRIPTAN          | -7.5  | -5.7 |
| FULVESTRANT           | -8.8  | -5.5 |
| FURAZOLIDONE          | -6.7  | -5.7 |
| FUROSEMIDE            | -7.6  | -5.6 |
| GABAPENTIN            | -5.5  | -5.8 |
| GABAPENTIN ENACARBIL  | -7.2  | -5.9 |
| GALANTAMINE           | -7.7  | -5.0 |
| GALANTHAMINE          | -7.8  | -5.7 |
| GALLAMINE             | -5.6  | -4.6 |
| GANCICLOVIR           | -6.9  | -5.2 |
| GANIRELIX             | -6.2  | -6.4 |
| GATIFLOXACIN          | -8.1  | -5.5 |
| GEFITINIB             | -8.4  | -6.2 |
| GEMCITABINE           | -6.9  | -6.0 |
| GEMFIBROZIL           | -6.8  | -5.3 |
| GEMIFLOXACIN          | -8.3  | -6.3 |
| GENTAMICIN            | -7.3  | -5.9 |
| GENTIAN VIOLET        | -6.9  | -6.1 |
| GILTERITINIB          | -8.8  | -6.9 |
| GLASDEGIB             | -8.6  | -6.8 |
| GLECAPREVIR           | -11.5 | -6.7 |
| GLIMEPIRIDE           | -10.1 | -7.5 |
| GLIPIZIDE             | -10.1 | -7.1 |
| GLUCONOLACTONE        | -5.6  | -5.1 |
| GLUTAMINE             | -5.0  | -5.3 |
| GLUTATHIONE DISULFIDE | -6.9  | -6.2 |
| GLUTETHIMIDE          | -7.2  | -5.1 |
| GLYCINE               | -3.4  | -5.8 |
| GLYCOPYRROLATE        | -7.7  | -6.0 |
| GLYCOPYRRONIUM        | -7.7  | -5.6 |
| GOSERELIN             | -6.6  | -5.5 |
| GRAMICIDIN            | -5.3  | -5.2 |
| GRANISETRON           | -8.0  | -6.5 |

|                              |       |      |
|------------------------------|-------|------|
| GREPAFLOXACIN                | -7.8  | -6.0 |
| GRISEOFULVIN                 | -7.3  | -5.4 |
| GUAIFENESIN                  | -5.8  | -4.6 |
| GUANABENZ                    | -6.6  | -5.3 |
| GUANADREL                    | -6.8  | -6.0 |
| GUANETHIDINE                 | -6.3  | -5.4 |
| GUANFACINE                   | -6.9  | -5.7 |
| GUANIDINE                    | -3.2  | -2.7 |
| HALAZEPAM                    | -8.1  | -5.8 |
| HALCINONIDE                  | -10.4 | -7.0 |
| HALOFANTRINE                 | -8.0  | -4.7 |
| HALOPERIDOL                  | -8.9  | -6.8 |
| HALOPROGIN                   | -5.6  | -4.1 |
| HALOTHANE                    | -4.1  | -4.0 |
| HETACILLIN                   | -8.3  | -5.4 |
| HEXACHLOROPHENE              | -7.8  | -5.1 |
| HEXOCYCLIUM                  | -7.9  | -5.5 |
| HEXYLCAINE                   | -7.0  | -5.3 |
| HISTAMINE                    | -4.3  | -4.1 |
| HISTRELIN                    | -7.5  | -5.4 |
| HOMATROPINE METHYLBROMIDE    | -7.4  | -5.9 |
| HYDRALAZINE                  | -6.9  | -5.9 |
| HYDROCHLOROTHIAZIDE          | -7.6  | -5.7 |
| HYDROCODONE                  | -7.9  | -5.7 |
| HYDROCORTAMATE               | -8.3  | -6.4 |
| HYDROCORTISONE               | -9.0  | -5.6 |
| HYDROCORTISONE ACETATE       | -8.9  | -6.6 |
| HYDROCORTISONE BUTYRATE      | -9.0  | -6.1 |
| HYDROCORTISONE CYPIONATE     | -9.7  | -7.5 |
| HYDROCORTISONE PROBUTATE     | -8.4  | -5.5 |
| HYDROCORTISONE VALERATE      | -8.9  | -6.4 |
| HYDROFLUMETHIAZIDE           | -7.9  | -5.8 |
| HYDROMORPHONE                | -7.7  | -5.7 |
| HYDROXYAMPHETAMINE           | -5.8  | -5.3 |
| HYDROXYCHLOROQUINE           | -6.4  | -4.9 |
| HYDROXYPROGESTERONE CAPROATE | -9.3  | -5.5 |
| HYDROXYSTILBAMIDINE          | -7.8  | -5.6 |
| HYDROXYUREA                  | -3.9  | -3.8 |
| HYDROXYZINE                  | -6.7  | -5.6 |
| IBANDRONATE                  | -6.0  | -4.6 |
| IBUPROFEN                    | -6.6  | -6.2 |

|                        |       |      |
|------------------------|-------|------|
| IBUTILIDE              | -6.9  | -5.1 |
| ICATIBANT              | -7.3  | -4.9 |
| IDARUBICIN             | -10.5 | -6.5 |
| IDOXURIDINE            | -7.0  | -5.4 |
| IFOSFAMIDE             | -5.2  | -4.4 |
| IMATINIB               | -9.0  | -7.9 |
| IMIPENEM               | -7.3  | -4.8 |
| IMIPRAMINE             | -7.3  | -5.4 |
| IMIQUIMOD              | -7.2  | -7.2 |
| IMN                    | -8.6  | -5.8 |
| INDACATEROL            | -8.8  | -6.8 |
| INDAPAMIDE             | -8.6  | -6.9 |
| INDECAINIDE            | -7.3  | -4.9 |
| INDINAVIR              | -9.6  | -7.1 |
| INDOMETHACIN           | -8.3  | -5.6 |
| INGENOL MEBUTATE       | -8.6  | -6.1 |
| IPRATROPIUM            | -7.2  | -5.4 |
| IRBESARTAN             | -9.0  | -6.1 |
| IRINOTECAN             | -10.5 | -8.1 |
| ISOCARBOXAZID          | -7.3  | -5.8 |
| ISOETHARINE            | -6.6  | -4.9 |
| ISOFLURANE             | -4.8  | -4.7 |
| ISOFLUROPHATE          | -4.9  | -3.7 |
| ISONIAZID              | -6.0  | -5.2 |
| ISOPROPAMIDE           | -6.6  | -5.2 |
| ISOPROTERENOL          | -6.4  | -5.1 |
| ISOSORBIDE             | -5.0  | -4.2 |
| ISOSORBIDE DINITRATE   | -6.6  | -4.8 |
| ISOSORBIDE MONONITRATE | -5.9  | -4.7 |
| ISOTRETINOIN           | -7.7  | -6.2 |
| ISRADIPINE             | -7.1  | -5.1 |
| ITRACONAZOLE           | -7.5  | -7.5 |
| IVACAFTOR              | -8.2  | -7.0 |
| IVOSIDENIB             | -8.6  | -5.7 |
| IXABEPILONE            | -8.9  | -6.1 |
| JFD00715               | -7.5  | -5.7 |
| KANAMYCIN              | -7.3  | -5.8 |
| KETAMINE               | -6.7  | -4.7 |
| KETOCONAZOLE           | -8.8  | -6.9 |
| KETOPROFEN             | -7.9  | -7.1 |
| KETOROLAC              | -7.6  | -5.9 |

|                      |       |      |
|----------------------|-------|------|
| KETOTIFEN            | -8.8  | -5.7 |
| LABETALOL            | -7.8  | -6.3 |
| LACOSAMIDE           | -6.5  | -5.2 |
| LACTIC ACID          | -4.0  | -3.5 |
| LAMIVUDINE           | -6.4  | -5.3 |
| LAMOTRIGINE          | -7.2  | -7.0 |
| LANREOTIDE           | -5.9  | -4.4 |
| LANSOPRAZOLE         | -8.5  | -5.9 |
| LAPATINIB            | -10.2 | -7.3 |
| LAROTRECTINIB        | -9.8  | -6.5 |
| LATANOPROSTENE BUNOD | -7.3  | -5.1 |
| LEFLUNOMIDE          | -7.6  | -6.4 |
| LENALIDOMIDE         | -7.5  | -5.7 |
| LETERMOVIR           | -9.0  | -6.9 |
| LETROZOLE            | -8.3  | -5.7 |
| LEUCOVORIN           | -8.4  | -6.7 |
| LEVALBUTEROL         | -6.7  | -5.9 |
| LEVALLORPHAN         | -7.8  | -5.4 |
| LEVAMISOLE           | -6.1  | -5.8 |
| LEVETIRACETAM        | -5.4  | -4.3 |
| LEVOBETAXOLOL        | -6.7  | -5.1 |
| LEVOBUNOLOL          | -7.3  | -5.3 |
| LEVOBUPIVACAINE      | -7.1  | -5.7 |
| LEVOCABASTINE        | -8.4  | -7.9 |
| LEVOCARNITINE        | -4.6  | -4.2 |
| LEVOCETIRIZINE       | -8.0  | -5.9 |
| LEVODOPA             | -6.6  | -6.1 |
| LEVOFLOXACIN         | -8.3  | -6.0 |
| LEVOMEFOLATE         | -8.9  | -6.9 |
| LEVOMEPRMAZINE       | -7.3  | -4.9 |
| LEVOMETHADYL ACETATE | -6.6  | -4.7 |
| LEVONORDEFRIN        | -6.2  | -5.8 |
| LEVONORGESTREL       | -8.5  | -6.2 |
| LEVOPROPOXYPHENE     | -6.8  | -4.8 |
| LEVORPHANOL          | -7.9  | -5.4 |
| LEVOTHYROXINE        | -6.5  | -4.6 |
| L-GLUTAMINE          | -5.1  | -4.7 |
| L-HISTAMINE          | -4.3  | -7.3 |
| LIDOCAINE            | -6.2  | -6.5 |
| LIFITEGRAST          | -10.4 | -5.2 |
| LINAGLIPTIN          | -9.8  | -6.6 |

|                             |       |      |
|-----------------------------|-------|------|
| LINCOMYCIN                  | -6.7  | -5.3 |
| LINEZOLID                   | -8.0  | -4.8 |
| LIOTHYRONINE                | -7.4  | -5.3 |
| LISDEXAMFETAMINE            | -6.4  | -4.6 |
| LISINOPRIL                  | -7.2  | -4.8 |
| LOFEXIDINE                  | -6.5  | -5.9 |
| LOMEFLOXACIN                | -8.2  | -6.1 |
| LOMUSTINE                   | -6.3  | -5.3 |
| LOPERAMIDE                  | -8.4  | -6.3 |
| LOPINAVIR                   | -8.7  | -5.9 |
| LORACARBEF                  | -8.2  | -6.0 |
| LORATADINE                  | -8.0  | -6.3 |
| LORAZEPAM                   | -7.8  | -5.9 |
| LORLATINIB                  | -8.9  | -6.2 |
| LOSARTAN                    | -8.3  | -6.4 |
| LOTEPREDNOL ETABONATE       | -9.0  | -5.8 |
| LOVASTATIN                  | -8.2  | -6.2 |
| LOXAPINE                    | -8.5  | -5.9 |
| LUBIPROSTONE                | -7.4  | -5.7 |
| LUMEFANTRINE                | -7.6  | -4.7 |
| LURASIDONE                  | -10.2 | -7.9 |
| LUSUTROMBOPAG               | -8.4  | -6.5 |
| MACIMORELIN                 | -9.0  | -6.4 |
| MAFENIDE                    | -6.6  | -4.9 |
| MAPROTILINE                 | -7.7  | -6.1 |
| MARAVIROC                   | -9.1  | -6.3 |
| MASOPROCOL                  | -7.3  | -6.0 |
| MAYTANSINE                  | -8.7  | -5.4 |
| MAZINDOL                    | -8.6  | -5.9 |
| MEBENDAZOLE                 | -8.1  | -6.6 |
| MEBUTAMATE                  | -5.5  | -5.5 |
| MECAMYLAMINE                | -5.8  | -4.5 |
| MECHLORETHAMINE             | -3.6  | -3.1 |
| MECLIZINE                   | -9.4  | -6.6 |
| MECLOCYCLINE                | -8.6  | -6.4 |
| MECLOFENAMATE               | -7.8  | -6.3 |
| MEDROXYPROGESTERONE ACETATE | -8.4  | -6.1 |
| MEDRYSONE                   | -8.7  | -6.6 |
| MEFENAMIC ACID              | -7.9  | -5.5 |
| MEFLOQUINE                  | -8.5  | -6.1 |
| MEGESTROL ACETATE           | -8.6  | -6.2 |

|                 |      |      |
|-----------------|------|------|
| MELOXICAM       | -8.7 | -6.1 |
| MELPHALAN       | -6.2 | -4.8 |
| MEMANTINE       | -6.3 | -5.2 |
| MENADIOL        | -6.5 | -5.6 |
| MENADIONE       | -6.8 | -5.4 |
| MENAQUINONE     | -9.2 | -4.9 |
| MENTHOL         | -5.8 | -5.3 |
| MEPENZOLATE     | -7.8 | -5.8 |
| MEPERIDINE      | -6.8 | -4.9 |
| MEPHENTERMINE   | -5.6 | -5.0 |
| MEPHENYTOIN     | -6.9 | -4.9 |
| MEPIVACAINE     | -7.1 | -5.3 |
| MEPREDNISONE    | -8.7 | -6.5 |
| MEPROBAMATE     | -5.6 | -5.2 |
| MEQUINOL        | -5.1 | -4.7 |
| MERCAPTOPYRINE  | -5.1 | -4.9 |
| MEROPENEM       | -8.0 | -5.9 |
| MESALAMINE      | -5.7 | -5.3 |
| MESNA           | -4.2 | -3.4 |
| MESORIDAZINE    | -8.3 | -5.7 |
| MESTRANOL       | -8.3 | -6.6 |
| METAPROTERENOL  | -5.8 | -6.0 |
| METARAMINOL     | -6.0 | -6.0 |
| METAXALONE      | -6.9 | -5.5 |
| METFORMIN       | -4.7 | -4.2 |
| METHACHOLINE    | -4.8 | -3.8 |
| METHACYCLINE    | -8.3 | -6.7 |
| METHADONE       | -6.6 | -5.8 |
| METHAMPHETAMINE | -5.3 | -5.3 |
| METHARBITAL     | -6.1 | -4.7 |
| METHAZOLAMIDE   | -6.4 | -4.9 |
| METHDILAZINE    | -8.0 | -5.4 |
| METHICILLIN     | -7.2 | -5.5 |
| METHIMAZOLE     | -3.8 | -3.6 |
| METHIXENE       | -8.5 | -5.8 |
| METHOCARBAMOL   | -6.2 | -5.7 |
| METHOHEXITAL    | -7.1 | -4.7 |
| METHOTREXATE    | -8.6 | -6.5 |
| METHOXAMINE     | -5.8 | -5.6 |
| METHOXSALEN     | -7.1 | -5.1 |
| METHOXYFLURANE  | -4.4 | -4.0 |

|                              |       |      |
|------------------------------|-------|------|
| METHSCOPOLAMINE              | -7.6  | -5.9 |
| METHSUXIMIDE                 | -6.8  | -6.4 |
| METHYCLOTHIAZIDE             | -6.9  | -5.9 |
| METHYL AMINOLEVULINATE       | -4.7  | -4.2 |
| METHYL SALICYLATE            | -5.3  | -4.8 |
| METHYLDOPA                   | -6.8  | -4.8 |
| METHYLDOPATE                 | -6.3  | -5.9 |
| METHYLERGONOVINE             | -8.2  | -6.4 |
| METHYLNALTREXONE             | -7.9  | -6.0 |
| METHYLPHENIDATE              | -6.9  | -6.3 |
| METHYLPREDNISOLONE           | -8.8  | -6.1 |
| METHYLPREDNISOLONE ACETATE   | -8.3  | -6.9 |
| METHYLPREDNISOLONE SUCCINATE | -8.3  | -6.8 |
| METHYLTESTOSTERONE           | -8.8  | -6.4 |
| METHYSERGIDE                 | -7.7  | -6.1 |
| METIPRANOLOL                 | -6.7  | -5.2 |
| METOCLOPRAMIDE               | -6.3  | -4.9 |
| METOCURINE                   | -10.2 | -6.7 |
| METOLAZONE                   | -8.7  | -6.6 |
| METOPROLOL                   | -6.2  | -5.1 |
| METRONIDAZOLE                | -5.6  | -4.7 |
| METYRAPONE                   | -6.6  | -6.0 |
| METYROSINE                   | -6.5  | -5.8 |
| MEXILETINE                   | -5.8  | -4.9 |
| MEZLOCILLIN                  | -9.0  | -7.1 |
| MICONAZOLE                   | -7.2  | -5.5 |
| MIDAZOLAM                    | -8.6  | -6.0 |
| MIDODRINE                    | -6.3  | -4.9 |
| NABILONE                     | -7.8  | -5.4 |
| NABUMETONE                   | -6.9  | -5.9 |
| NADOLOL                      | -7.3  | -6.0 |
| NAFARELIN                    | -9.7  | -6.1 |
| NAFCILLIN                    | -8.4  | -5.9 |
| NAFTIFINE                    | -8.2  | -5.9 |
| NALBUPHINE                   | -7.8  | -6.1 |
| NALDEMEDINE                  | -10.2 | -7.2 |
| NALIDIXIC_ACID               | -6.6  | -5.1 |
| NALMEFENE                    | -8.1  | -5.6 |
| NALOXONE                     | -7.4  | -5.4 |
| NALTREXONE                   | -7.9  | -5.5 |
| NANDROLONE                   | -8.5  | -5.8 |

|                           |      |      |
|---------------------------|------|------|
| NANDROLONE DECANOATE      | -8.4 | -6.2 |
| NANDROLONE PHENPROPIONATE | -9.1 | -7.2 |
| NAPHAZOLINE               | -6.9 | -5.4 |
| NAPROXEN                  | -7.4 | -6.8 |
| NARATRIPTAN               | -7.8 | -6.3 |
| NATAMYCIN                 | -7.4 | -6.2 |
| NATEGLINIDE               | -7.9 | -6.1 |
| NEBIVOLOL                 | -9.4 | -6.9 |
| NEDOCROMIL                | -7.5 | -5.5 |
| NEFAZODONE                | -8.7 | -6.1 |
| NELARABINE                | -6.7 | -5.8 |
| NELFINAVIR                | -9.0 | -6.2 |
| NEOMYCIN                  | -7.0 | -5.3 |
| NERATINIB                 | -9.0 | -6.6 |
| NETARSUDIL                | -9.9 | -7.3 |
| NEVIRAPINE                | -7.8 | -5.4 |
| NIACIN                    | -5.2 | -4.7 |
| NICARDIPINE               | -8.1 | -5.8 |
| NICLOSAMIDE               | -7.9 | -6.2 |
| NICOTINE                  | -5.4 | -5.1 |
| NIFEDIPINE                | -7.2 | -4.9 |
| NILOTINIB                 | -9.8 | -7.7 |
| NILUTAMIDE                | -7.7 | -5.9 |
| NIMODIPINE                | -7.5 | -4.8 |
| NIRAPARIB                 | -8.6 | -6.6 |
| NITAZOXANIDE              | -7.5 | -6.1 |
| NITISINONE uff            | -7.8 | -5.9 |
| NITROFURANTOIN            | -7.2 | -5.8 |
| NITROFUZZONE              | -6.5 | -5.5 |
| NITROGLYCERIN             | -5.7 | -4.6 |
| NIZATIDINE                | -5.7 | -4.7 |
| NORELGESTROMIN            | -8.7 | -6.3 |
| NOREPINEPHRINE            | -5.9 | -5.6 |
| NORETHINDRONE             | -8.5 | -6.4 |
| NORETHINDRONE ACETATE     | -8.5 | -6.3 |
| NORETHYNODREL             | -8.5 | -6.7 |
| NORFLOXACIN               | -8.0 | -5.7 |
| NORGESTIMATE              | -8.4 | -6.0 |
| NORGESTREL                | -8.3 | -6.2 |
| NORTRIPTYLINE             | -7.7 | -5.9 |
| NOVOBIOCIN                | -9.3 | -7.2 |

|                        |       |      |
|------------------------|-------|------|
| NYSTATIN               | -6.8  | -4.5 |
| OCTINOXATE             | -5.9  | -4.7 |
| OFLOXACIN              | -7.6  | -6.2 |
| OLANZAPINE             | -7.8  | -6.1 |
| OLOPATADINE            | -8.0  | -6.2 |
| OLSALAZINE             | -8.1  | -6.5 |
| OMADACYCLINE           | -8.0  | -6.3 |
| OMEPRAZOLE             | -7.5  | -6.0 |
| ONDANSETRON            | -8.4  | -6.1 |
| ORLISTAT               | -6.2  | -4.5 |
| ORPHENADRINE           | -6.7  | -4.6 |
| OSELTAMIVIR            | -7.0  | -4.7 |
| OXACILLIN              | -8.5  | -6.6 |
| OXAMNIQUINE            | -7.3  | -6.3 |
| OXANDROLONE            | -8.5  | -6.4 |
| OXAPROZIN              | -8.0  | -6.6 |
| OXAZEPAM               | -7.8  | -5.7 |
| OXCARBAZEPINE          | -8.1  | -6.4 |
| OXICONAZOLE            | -7.3  | -6.2 |
| OXPRENOLOL             | -6.1  | -4.9 |
| OXTRIPHYLLINE          | -6.0  | -5.0 |
| OXYBUTYNIN             | -6.9  | -4.6 |
| OXYCODONE              | -7.9  | -5.7 |
| OXYMETHOLONE           | -8.3  | -6.9 |
| OXYMORPHONE            | -7.7  | -5.8 |
| OXYPHENBUTAZONE        | -7.5  | -5.5 |
| OXYPHENCYCLIMINE       | -7.9  | -5.6 |
| OXYPHENONIUM           | -6.9  | -5.1 |
| OXYTETRACYCLINE        | -8.2  | -6.3 |
| OZENOXACIN             | -8.4  | -6.5 |
| PACLITAXEL             | -10.3 | -6.9 |
| PALIPERIDONE           | -10.0 | -7.5 |
| PALIPERIDONE PALMITATE | -8.7  | -6.4 |
| PALONOSETRON           | -8.3  | -5.9 |
| PAMIDRONATE            | -5.4  | -4.2 |
| PANCURONIUM            | -8.2  | -7.0 |
| PANTOPRAZOLE           | -7.9  | -5.8 |
| PANTOTHENIC ACID       | -5.6  | -4.3 |
| PARAMETHADIONE         | -5.5  | -4.3 |
| PARAMETHASONE ACETATE  | -9.1  | -5.7 |
| PARGYLINE              | -5.2  | -5.2 |

|                      |       |      |
|----------------------|-------|------|
| PARICALCITOL         | -8.8  | -7.0 |
| PAROMOMYCIN          | -7.1  | -6.1 |
| PAROXETINE           | -7.8  | -6.7 |
| PEMETREXED           | -9.4  | -6.6 |
| PEMIROLAST           | -7.7  | -5.8 |
| PEMOLINE             | -6.3  | -6.2 |
| PENBUTOLOL           | -6.8  | -5.7 |
| PENCICLOVIR          | -6.6  | -5.3 |
| PENICILLAMINE        | -4.3  | -3.5 |
| PENICILLIN G         | -8.0  | -5.8 |
| PENICILLIN V         | -7.7  | -6.0 |
| PENTAMIDINE          | -6.6  | -5.8 |
| PENTAZOCINE          | -8.7  | -6.0 |
| PENTOBARBITAL        | -6.5  | -4.9 |
| PENTOLINIUM          | -5.7  | -4.6 |
| PENTOSAN POLYSULFATE | -7.0  | -5.4 |
| PENTOSTATIN          | -6.6  | -5.5 |
| PENTOXIFYLLINE       | -6.6  | -5.1 |
| PERGOLIDE            | -7.6  | -5.7 |
| PERPHENAZINE         | -7.5  | -5.5 |
| PHENACEMIDE          | -6.6  | -5.7 |
| PHENAZOPYRIDINE      | -6.9  | -5.6 |
| PHENDIMETRAZINE      | -5.8  | -5.6 |
| PHENELZINE           | -5.9  | -5.4 |
| PHENINDIONE          | -7.6  | -6.8 |
| PHENIRAMINE          | -6.9  | -6.1 |
| PHENMETRAZINE        | -6.2  | -5.4 |
| PHENOXYBENZAMINE     | -6.0  | -4.2 |
| PHENPROCOUMON        | -7.9  | -6.0 |
| PHENTERMINE          | -5.5  | -5.3 |
| PHENTOLAMINE         | -7.8  | -6.4 |
| PHENYL BUTAZONE      | -7.6  | -5.2 |
| PHENYL BUTYRATE      | -5.9  | -5.8 |
| PHENYLEPHRINE        | -5.7  | -5.6 |
| PHENYLPROPANOLAMINE  | -5.3  | -5.1 |
| PHENYTOIN            | -8.1  | -5.9 |
| PHYTONADIONE         | -8.6  | -5.3 |
| PIBRENTASVIR         | -7.5  | -6.6 |
| PILOCARPINE          | -5.9  | -5.3 |
| PIMOZIDE             | -10.1 | -6.9 |
| PINACIDIL            | -6.4  | -4.4 |

|                       |       |      |
|-----------------------|-------|------|
| PINDOLOL              | -6.4  | -5.1 |
| PIOGLITAZONE          | -8.6  | -6.3 |
| PIPECURONIUM          | -7.3  | -6.3 |
| PIPERACILLIN          | -9.2  | -6.4 |
| PIPERONYL BUTOXIDE    | -6.4  | -5.8 |
| PIPOBROMAN            | -5.3  | -4.6 |
| PIRBUTEROL            | -6.5  | -5.1 |
| PIROXICAM             | -8.7  | -6.4 |
| PITAVASTATIN          | -8.5  | -6.1 |
| PLAZOMICIN            | -7.3  | -5.6 |
| PLECANATIDE           | -4.2  | -2.0 |
| PLICAMYCIN            | -9.7  | -6.3 |
| PODOFILOX             | -7.9  | -5.6 |
| POLYTHIAZIDE          | -7.6  | -6.1 |
| POSACONAZOLE          | -7.8  | -6.2 |
| PRALATREXATE          | -10.0 | -7.3 |
| PRALIDOXIME           | -5.3  | -6.9 |
| PRAMIPEXOLE           | -5.9  | -4.9 |
| PRAMOXINE             | -6.4  | -4.4 |
| PRASTERONE            | -8.3  | -5.0 |
| PRASUGREL             | -8.4  | -5.9 |
| PRAVASTATIN           | -7.7  | -6.0 |
| PRAZEPAM              | -8.1  | -6.3 |
| PRAZIQUANTEL          | -8.6  | -5.5 |
| PRAZOSIN              | -7.7  | -6.4 |
| PREDNICARBATE         | -8.5  | -6.0 |
| PREDNISOLONE          | -8.3  | -7.2 |
| PREDNISOLONE TEBUTATE | -8.8  | -6.2 |
| PREDNISONONE          | -8.9  | -6.3 |
| PREGABALIN            | -5.2  | -6.4 |
| PRILOCAINE            | -6.6  | -4.9 |
| PRIMAQUINE            | -7.0  | -6.0 |
| PRIMIDONE             | -6.8  | -5.1 |
| PROBENECID            | -6.8  | -4.9 |
| PROBUCOL              | -8.7  | -5.1 |
| PROCAINAMIDE          | -6.3  | -5.1 |
| PROCAINE              | -5.9  | -4.9 |
| PROCARBAZINE          | -6.6  | -5.0 |
| PROCHLORPERAZINE      | -7.5  | -5.2 |
| PROCYCLIDINE          | -7.6  | -5.7 |
| PROGESTERONE          | -8.6  | -6.3 |

|                  |      |      |
|------------------|------|------|
| PROGUANIL        | -6.9 | -6.2 |
| PROMAZINE        | -7.0 | -5.1 |
| PROMETHAZINE     | -7.2 | -4.7 |
| PROPAFENONE      | -6.8 | -4.8 |
| PROPANTHELINE    | -8.0 | -5.4 |
| PROPARACAINE     | -5.6 | -6.1 |
| PROPIOMAZINE     | -7.6 | -4.5 |
| PROPOFOL         | -6.2 | -5.4 |
| PROPOXYPHENE     | -6.7 | -5.9 |
| PROPRANOLOL      | -7.2 | -4.8 |
| PROPYLTHIOURACIL | -5.5 | -5.5 |
| PROTIRELIN       | -8.1 | -5.1 |
| PROTOKYLOL       | -8.0 | -6.2 |
| PROTRIPTYLINE    | -7.2 | -5.9 |
| PRUCALOPRIDE     | -7.2 | -5.8 |
| PSEUDOEPHEDRINE  | -5.7 | -5.5 |
| PTERIDINE        | -8.0 | -5.2 |
| PYRAZINAMIDE     | -4.9 | -4.7 |
| PYRIDOSTIGMINE   | -5.6 | -4.8 |
| PYRIDOXINE       | -5.3 | -5.1 |
| PYRILAMINE       | -6.5 | -4.6 |
| PYRIMETHAMINE    | -6.8 | -5.4 |
| PYRVINIUM        | -8.0 | -7.1 |
| QUAZEPAM         | -7.2 | -5.8 |
| QUETIAPINE       | -7.5 | -5.8 |
| QUINAPRIL        | -7.8 | -6.3 |
| QUINESTROL       | -9.1 | -7.2 |
| QUINETHAZONE     | -7.2 | -5.8 |
| QUINIDINE        | -8.1 | -5.9 |
| QUININE          | -7.4 | -6.2 |
| RABEPRAZOLE      | -7.8 | -6.0 |
| RALOXIFENE       | -9.4 | -6.5 |
| RAMELTEON        | -7.6 | -6.0 |
| RAMIPRIL         | -8.2 | -5.8 |
| RANITIDINE       | -6.1 | -5.0 |
| RANOLAZINE       | -8.4 | -6.3 |
| RAPACURONIUM     | -5.7 | -5.6 |
| RASAGILINE       | -6.1 | -4.9 |
| REGADENOSON      | -7.7 | -6.4 |
| REMIFENTANIL     | -6.8 | -4.8 |
| REPAGLINIDE      | -8.0 | -5.6 |

|                      |       |      |
|----------------------|-------|------|
| RESCINNAMINE         | -9.0  | -6.5 |
| RESERPINE            | -6.3  | -6.4 |
| RETAPAMULIN          | -8.3  | -5.6 |
| REVEFENACIN          | -10.6 | -6.9 |
| RIBAVIRIN            | -6.8  | -5.4 |
| RIBOCICLIB           | -8.7  | -7.3 |
| RIBOFLAVIN           | -7.8  | -6.4 |
| RIBOFLAVIN PHOSPHATE | -8.3  | -6.2 |
| RIFAMYCIN            | -6.3  | -6.0 |
| RIFAPENTINE          | -6.4  | -6.5 |
| RIFAXIMIN            | -6.6  | -5.9 |
| RILPIVIRINE          | -9.2  | -6.4 |
| RILUZOLE             | -6.9  | -4.8 |
| RIMANTADINE          | -6.2  | -5.1 |
| RIMEXOLONE           | -8.9  | -6.7 |
| RISEDRONATE          | -6.5  | -5.1 |
| RISPERIDONE          | -9.7  | -7.7 |
| RITODRINE            | -7.7  | -4.8 |
| RITONAVIR            | -9.0  | -5.8 |
| RIVAROXABAN          | -9.0  | -7.1 |
| RIVASTIGMINE         | -6.7  | -4.9 |
| RIZATRIPTAN          | -7.0  | -5.5 |
| ROCURONIUM           | -9.0  | -5.5 |
| ROFECOXIB            | -8.1  | -5.8 |
| ROFLUMILAST          | -7.7  | -5.7 |
| ROMIDEPSIN           | -10.1 | -6.2 |
| ROPINIROLE           | -6.1  | -4.8 |
| ROPIVACAINE          | -7.3  | -5.3 |
| ROSIGLITAZONE        | -7.7  | -5.7 |
| ROSUVASTATIN         | -7.9  | -6.0 |
| ROTIGOTINE           | -7.5  | -5.7 |
| RUCAPARIB            | -9.4  | -6.9 |
| RUXOLITINIB          | -8.5  | -6.1 |
| SAFINAMIDE           | -7.8  | -6.1 |
| SALMETEROL           | -7.3  | -6.0 |
| SAPROPTERIN          | -7.2  | -5.4 |
| SAQUINAVIR           | -9.7  | -5.3 |
| SARALASIN            | -8.9  | -7.1 |
| SARECYCLINE          | -8.4  | -5.9 |
| SAXAGLIPTIN          | -7.8  | -5.9 |
| SCH                  | -7.6  | -6.1 |

|                     |      |      |
|---------------------|------|------|
| SCOPOLAMINE         | -7.1 | -5.6 |
| SECNIDAZOLE         | -5.9 | -4.4 |
| SECOBARBITAL        | -6.7 | -4.7 |
| SEGESTERONE ACETATE | -8.7 | -6.0 |
| SELEGILINE          | -5.3 | -5.4 |
| SERTACONAZOLE       | -7.6 | -5.8 |
| SERTRALINE          | -7.8 | -5.7 |
| SEVOFLURANE         | -5.1 | -4.9 |
| SIBUTRAMINE         | -6.9 | -4.6 |
| SILDENAFIL          | -8.5 | -6.6 |
| SILODOSIN           | -8.2 | -5.8 |
| SIMVASTATIN         | -8.5 | -6.4 |
| SIPONIMOD           | -9.3 | -7.1 |
| SIROLIMUS           | -7.5 | -6.6 |
| SITAGLIPTIN         | -8.9 | -7.1 |
| SOLIFENACIN         | -8.7 | -6.2 |
| SOLRIAMFETOL        | -6.1 | -5.5 |
| SORAFENIB           | -9.6 | -7.7 |
| SOTALOL             | -6.3 | -5.5 |
| SPARFLOXACIN        | -8.1 | -6.1 |
| SPECTINOMYCIN       | -7.7 | -5.4 |
| SPIRAPRIL           | -7.1 | -5.7 |
| STANOZOLOL          | -8.8 | -6.6 |
| STAVUDINE           | -6.8 | -5.1 |
| STIRIPENTOL         | -7.0 | -5.4 |
| STREPTOMYCIN        | -7.6 | -5.5 |
| STREPTOZOCIN        | -6.8 | -5.7 |
| SUCCIMER            | -4.5 | -3.6 |
| SUCCINYLBCHOLINE    | -5.1 | -4.3 |
| SUFENTANIL          | -7.4 | -5.2 |
| SULBACTAM           | -6.6 | -4.8 |
| SULCONAZOLE         | -7.5 | -5.2 |
| SULFACETAMIDE       | -6.1 | -5.8 |
| SULFACYTINE         | -7.3 | -5.5 |
| SULFADIAZINE        | -7.0 | -5.9 |
| SULFADOXINE         | -6.9 | -5.3 |
| SULFAMERAZINE       | -7.4 | -5.8 |
| SULFAMETHAZINE      | -7.7 | -5.9 |
| SULFAMETHIZOLE      | -7.0 | -5.7 |
| SULFAMETHOXAZOLE    | -7.4 | -5.4 |
| SULFANILAMIDE       | -5.8 | -5.6 |

|                        |       |      |
|------------------------|-------|------|
| SULFAPYRIDINE          | -7.0  | -5.9 |
| SULFASALAZINE          | -9.2  | -7.2 |
| SULFINPYRAZONE         | -8.9  | -6.4 |
| SULFISOXAZOLE          | -7.3  | -5.7 |
| SULFISOXAZOLE ACETYL   | -7.3  | -5.6 |
| SULFOXONE              | -7.7  | -6.5 |
| SUMATRIPTAN            | -6.6  | -5.4 |
| SUNITINIB              | -8.2  | -6.3 |
| SUPROFEN               | -7.4  | -6.4 |
| TACRINE                | -7.1  | -5.8 |
| TADALAFIL              | -8.9  | -6.9 |
| TAFAMIDIS              | -8.4  | -6.2 |
| TAFENOQUINE            | -9.2  | -5.7 |
| TAFLUPROST             | -7.3  | -5.6 |
| TALAZOPARIB            | -8.7  | -6.0 |
| TAMOXIFEN              | -7.9  | -5.4 |
| TAMSULOSIN             | -7.7  | -5.7 |
| TAPENTADOL             | -6.5  | -4.6 |
| TAZAROTENE             | -7.5  | -6.1 |
| TAZOBACTAM             | -7.4  | -5.2 |
| TECOVIRIMAT            | -9.3  | -6.9 |
| TEGASEROD              | -7.7  | -5.5 |
| TELAPREVIR             | -9.5  | -6.3 |
| TELAVANCIN             | -4.7  | -4.6 |
| TELBIVUDINE            | -6.8  | -5.2 |
| TELMISARTAN            | -10.4 | -6.7 |
| TELOTTRISTAT           | -10.3 | -6.8 |
| TELOTTRISTAT ETHYL     | -10.2 | -6.0 |
| TEMAZEPAM              | -7.7  | -6.1 |
| TEMOZOLOMIDE           | -6.5  | -6.6 |
| TEMSIROLIMUS           | -7.4  | -6.1 |
| TENIPOSIDE             | -8.8  | -6.3 |
| TENOFOVIR              | -7.1  | -5.7 |
| TENOFOVIR DISOPROXIL   | -6.5  | -5.8 |
| TERAZOSIN              | -7.8  | -6.0 |
| TERBINAFINE            | -7.7  | -5.6 |
| TERBUTALINE            | -6.0  | -4.9 |
| TERCONAZOLE            | -8.8  | -6.8 |
| TESTOLACTONE           | -9.1  | -6.0 |
| TESTOSTERONE           | -8.6  | -6.0 |
| TESTOSTERONE CYPIONATE | -9.5  | -6.7 |

|                         |      |      |
|-------------------------|------|------|
| TESTOSTERONE ENANTHATE  | -8.5 | -6.3 |
| TESTOSTERONE PROPIONATE | -8.5 | -6.2 |
| TETRABENAZINE           | -7.5 | -5.7 |
| TETRACAINE              | -6.1 | -4.9 |
| TETRACYCLINE            | -8.2 | -6.3 |
| TETRAHYDROZOLINE        | -7.0 | -6.6 |
| TEZACAFTOR              | -9.0 | -7.3 |
| THALIDOMIDE             | -7.8 | -6.4 |
| THEOPHYLLINE            | -6.0 | -4.9 |
| THIABENDAZOLE           | -6.5 | -5.9 |
| THIAMYLAL               | -6.4 | -4.6 |
| THIETHYLPERAZINE        | -7.3 | -5.4 |
| THIOGUANINE             | -5.9 | -5.5 |
| THIORIDAZINE            | -8.0 | -5.5 |
| THIOTHIXENE             | -8.7 | -5.9 |
| THONZONIUM              | -6.0 | -5.1 |
| TIAGABINE               | -7.6 | -6.2 |
| TICARCILLIN             | -7.3 | -6.1 |
| TICLOPIDINE             | -6.7 | -5.5 |
| TIGECYCLINE             | -8.3 | -6.7 |
| TILUDRONATE             | -6.6 | -5.2 |
| TIMOLOL                 | -6.4 | -5.1 |
| TINIDAZOLE              | -6.2 | -4.7 |
| TIOCONAZOLE             | -6.9 | -5.4 |
| TIOPRONIN               | -4.8 | -3.6 |
| TIOTROPIUM              | -7.6 | -5.9 |
| TIROFIBAN               | -7.4 | -5.4 |
| TIZANIDINE              | -7.1 | -5.8 |
| TMC-114                 | -8.5 | -5.6 |
| TOBRAMYCIN              | -7.3 | -5.6 |
| TOCAINIDE               | -6.3 | -5.1 |
| TOLAZAMIDE              | -8.7 | -6.1 |
| TOLAZOLINE              | -5.8 | -5.6 |
| TOLBUTAMIDE             | -6.9 | -5.6 |
| TOLCAPONE               | -8.3 | -7.3 |
| TOLMETIN                | -7.6 | -5.4 |
| TOLTERODINE             | -7.3 | -5.1 |
| TOLVAPTAN               | -9.4 | -7.3 |
| TOPIRAMATE              | -7.5 | -5.4 |
| TOPOTECAN               | -8.1 | -6.1 |
| TOREMIFENE              | -7.9 | -5.3 |

|                       |       |      |
|-----------------------|-------|------|
| TRAMADOL              | -6.6  | -5.3 |
| TRANDOLAPRIL          | -8.7  | -5.6 |
| TRAVOPROST            | -7.9  | -6.3 |
| TRAZODONE             | -8.6  | -6.7 |
| TREPROSTINIL          | -8.2  | -6.0 |
| TRETINOIN             | -7.9  | -6.0 |
| TRIAMCINOLONE         | -9.7  | -6.6 |
| TRIAMTERENE           | -7.5  | -6.5 |
| TRIAZOLAM             | -7.9  | -6.1 |
| TRICHLORMETHIAZIDE    | -7.4  | -5.7 |
| TRICLABENDAZOLE       | -7.3  | -5.4 |
| TRICLOFOS             | -5.2  | -4.3 |
| TRICLOSAN             | -6.9  | -4.6 |
| TRIDIHEXETHYL         | -6.9  | -6.2 |
| TRIENTINE             | -4.0  | -4.1 |
| TRIFLUOPERAZINE       | -7.8  | -5.9 |
| TRIFLUPROMAZINE       | -7.8  | -5.1 |
| TRIFLURIDINE          | -7.4  | -5.7 |
| TRIHEXYPHENIDYL       | -7.9  | -5.3 |
| TRILOSTANE            | -9.2  | -6.3 |
| TRIMEPRAZINE          | -7.1  | -4.8 |
| TRIMETHADIONE         | -5.1  | -4.3 |
| TRIMETHAPHAN          | -7.8  | -5.9 |
| TRIMETHOBENZAMIDE     | -7.6  | -5.3 |
| TRIMETHOPRIM          | -7.0  | -5.0 |
| TRIMIPRAMINE          | -7.6  | -5.5 |
| TRIPLENNAMINE         | -6.6  | -5.6 |
| TRIPROLIDINE          | -7.8  | -5.4 |
| TRIPTORELIN           | -6.3  | -5.2 |
| TROGLITAZONE          | -10.0 | -7.2 |
| TROLEANDOMYCIN        | -5.8  | -5.2 |
| TROPICAMIDE           | -6.8  | -5.0 |
| TROVAFLOXACIN         | -9.3  | -6.4 |
| TUBOCURARINE          | -8.9  | -6.8 |
| TYLOXAPOL             | -6.4  | -4.5 |
| TYROSINE              | -6.4  | -5.7 |
| ULIPRISTAL ACETATE    | -8.9  | -6.0 |
| UNOPROSTONE ISOPROPYL | -6.6  | -5.0 |
| URACIL MUSTARD        | -5.6  | -5.0 |
| URSODIOL              | -8.4  | -5.9 |
| VALACYCLOVIR          | -6.7  | -5.7 |

|                |      |      |
|----------------|------|------|
| VALBENAZINE    | -7.8 | -5.7 |
| VALDECOXIB     | -8.5 | -6.2 |
| VALGANCICLOVIR | -7.0 | -5.8 |
| VALPROIC ACID  | -5.0 | -4.5 |
| VALRUBICIN     | -9.9 | -5.8 |
| VALSARTAN      | -7.7 | -5.7 |
| VANCOMYCIN     | -7.7 | -5.4 |
| VANDETANIB     | -8.7 | -6.9 |
| VARDENAFIL     | -8.6 | -6.7 |
| VARENICLINE    | -7.1 | -5.8 |
| VASOPRESSIN    | -6.1 | -3.9 |
| VECURONIUM     | -9.0 | -6.9 |
| VEMURAFENIB    | -9.4 | -7.6 |
| VENLAFAXINE    | -6.8 | -5.4 |
| VERAPAMIL      | -7.6 | -5.8 |
| VIDARABINE     | -6.9 | -5.0 |
| VIGABATRIN     | -4.6 | -4.5 |
| VILAZODONE     | -9.9 | -7.6 |
| VINBLASTINE    | -8.2 | -5.7 |
| VINORELBINE    | -8.5 | -4.9 |
| VIOMYCIN       | -8.3 | -5.7 |
| VISMODEGIB     | -9.3 | -6.9 |
| VITAMIN_A      | -7.7 | -5.9 |
| VORINOSTAT     | -7.1 | -5.0 |
| VOXILAPREVIR   | -8.7 | -6.5 |
| WARFARIN       | -8.2 | -6.3 |
| ZAFIRLUKAST    | -9.6 | -7.1 |
| ZALCITABINE    | -6.8 | -5.5 |
| ZALEPLON       | -8.0 | -6.7 |
| ZANAMIVIR      | -6.6 | -5.1 |
| ZIDOVUDINE     | -6.9 | -5.5 |
| ZILEUTON       | -7.0 | -5.2 |
| ZIPRASIDONE    | -9.4 | -7.4 |
| ZOLMITRIPTAN   | -7.6 | -6.0 |
| ZOLPIDEM       | -7.7 | -6.0 |
| ZONISAMIDE     | -6.6 | -5.9 |

**Supplementary table 2:** List of anti-viral drugs that bind to ACE1 and ACE2 (Drugs listed in table 1 are shown in bold italic fonts).

| Ligand                        | Binding energy |             | Description (Wishart DS et al., 2018; Kim S et al., 2019)                                                                                                                                                                                                                                                                                                                                                             |
|-------------------------------|----------------|-------------|-----------------------------------------------------------------------------------------------------------------------------------------------------------------------------------------------------------------------------------------------------------------------------------------------------------------------------------------------------------------------------------------------------------------------|
|                               | Human ACE1     | Human ACE2  |                                                                                                                                                                                                                                                                                                                                                                                                                       |
| ABACAVIR                      | -8.2           | -6.3        | Abacavir is a powerful nucleoside analog reverse transcriptase inhibitor (NRTI) used to treat HIV and AIDS.                                                                                                                                                                                                                                                                                                           |
| ACYCLOVIR                     | -6.7           | -5.2        | Acyclovir is a nucleotide analog antiviral used to treat herpes simplex, <i>Varicella zoster</i> , herpes zoster, herpes labialis, and acute herpetic keratitis                                                                                                                                                                                                                                                       |
| ADEFOVIR<br>DIPIVOXIL         | -7.6           | -4.8        | Adefovir dipivoxil is an acyclic nucleotide analog reverse transcriptase inhibitor (ntRTI) used for treatment of hepatitis B. It is ineffective against HIV-1.                                                                                                                                                                                                                                                        |
| AMPRENAVIR                    | -7.5           | -5.1        | Amprenavir is a protease inhibitor used to treat HIV infection.                                                                                                                                                                                                                                                                                                                                                       |
| ATAZANAVIR                    | -8.5           | -6.4        | Atazanavir (formerly known as BMS-232632) is an antiretroviral drug of the protease inhibitor (PI) class. Like other antiretrovirals, it is used to treat infection of human immunodeficiency virus (HIV).                                                                                                                                                                                                            |
| BALOXAVIR                     | -9             | -6.4        | Baloxavir is an inhibitor of the influenza cap-dependent endonuclease enzyme and is used as therapy of influenza A and B.                                                                                                                                                                                                                                                                                             |
| <b>BALOXAVIR<br/>MARBOXIL</b> | -8.6           | <b>-6.4</b> | Baloxavirmarboxil is an antiviral drug for the treatment of influenza A and influenza B infections.                                                                                                                                                                                                                                                                                                                   |
| BICTEGRAVIR                   | -9.7           | -7.8        | Bictegravir is indicated in the management of HIV-1 infection.                                                                                                                                                                                                                                                                                                                                                        |
| BOCEPREVIR                    | -8.1           | -5.4        | Boceprevir is a direct acting antiviral medication used as part of combination therapy to treat chronic Hepatitis C, an infectious liver disease caused by infection with Hepatitis C Virus (HCV).                                                                                                                                                                                                                    |
| CIDOFOVIR                     | -6.4           | -5.6        | Cidofovir is an injectable antiviral medication employed in the treatment of cytomegalovirus (CMV) retinitis in patients diagnosed with AIDS.                                                                                                                                                                                                                                                                         |
| DARUNAVIR                     | -8.8           | -5.4        | Darunavir is a protease inhibitor used with other HIV protease inhibitor drugs as well as ritonavir for the effective management of HIV-1 infection. Darunavir is being studied as a possible treatment for SARS-CoV-2, the coronavirus responsible for COVID-19, due to in vitro evidence supporting its ability to combat this infection. Clinical trials are underway and are expected to conclude in August 2020. |
| DELAVIRDINE                   | -8.6           | -6.6        | A potent, non-nucleoside reverse transcriptase inhibitor with activity specific for HIV-1.                                                                                                                                                                                                                                                                                                                            |
| <b>DORAVIRINE</b>             | -8.5           | <b>-6.5</b> | Doravirine is an HIV-1 non-nucleoside reverse transcriptase inhibitor (NNRTI) intended to be administered in combination with other antiretroviral medicines.                                                                                                                                                                                                                                                         |
| EFAVIRENZ                     | -7.2           | -5.2        | Efavirenz (brand names Sustiva® and Stocrin®) is a non-nucleoside reverse transcriptase inhibitor (NNRTI) and is used as part of highly active antiretroviral therapy (HAART) for the treatment of a human immunodeficiency virus (HIV) type 1.                                                                                                                                                                       |
| ENTECAVIR                     | -7.3           | -6          | Entecavir is an oral antiviral drug used in the treatment of hepatitis B infection.                                                                                                                                                                                                                                                                                                                                   |
| FAMCICLOVIR                   | -7.1           | -5          | Famciclovir, marketed as Famvir by Novartis, is a guanine analogue used to treat herpes virus infections.                                                                                                                                                                                                                                                                                                             |
| GANCICLOVIR                   | -6.9           | -5.2        | An acyclovir analog that is a potent inhibitor of the Herpesvirus family                                                                                                                                                                                                                                                                                                                                              |

|                     |             |             |                                                                                                                                                                                                                                                                                                                                                          |
|---------------------|-------------|-------------|----------------------------------------------------------------------------------------------------------------------------------------------------------------------------------------------------------------------------------------------------------------------------------------------------------------------------------------------------------|
|                     |             |             | including cytomegalovirus.                                                                                                                                                                                                                                                                                                                               |
| GLECAPREVIR         | -11.5       | -6.7        | Glecaprevir is a direct acting antiviral agent and Hepatitis C virus (HCV) NS3/4A protease inhibitor that targets the the viral RNA replication.                                                                                                                                                                                                         |
| <b>INDINAVIR</b>    | -9.6        | <b>-7.1</b> | Indinavir is an antiretroviral protease inhibitor used in the therapy and prevention of human immunodeficiency virus (HIV) infection.                                                                                                                                                                                                                    |
| LETERMOVIR          | -9          | -6.9        | Letermovir received approval from the FDA on November 8th, 2017 for use in prophylaxis of cytomegalovirus (CMV) infection in allogeneic hematopoietic stem cell transplant patients.                                                                                                                                                                     |
| LOPINAVIR           | -8.7        | -5.9        | Lopinavir is an antiretroviral protease inhibitor used in combination with other antiretrovirals in the treatment of HIV-1 infection. Lopinavir is currently under investigation in combination with ritonavir for the treatment of COVID-19 caused by SARS-CoV-2.                                                                                       |
| <b>MARAVIROC</b>    | -9.1        | <b>-6.3</b> | A chemokine receptor antagonist drug that is designed to act against HIV by interfering with the interaction between HIV and CCR5                                                                                                                                                                                                                        |
| <b>NELFINAVIR</b>   | -9          | <b>-6.2</b> | Nelfinavir is a potent HIV-1 protease inhibitor.                                                                                                                                                                                                                                                                                                         |
| NEVIRAPINE          | -7.8        | -5.4        | A potent, non-nucleoside reverse transcriptase inhibitor (NNRTI) used in combination with nucleoside analogues for treatment of Human Immunodeficiency Virus Type 1 (HIV-1) infection and AIDS.                                                                                                                                                          |
| OSELTAMIVIR         | -7          | -4.7        | Oseltamivir (marketed as the product Tamiflu®), is an antiviral neuraminidase inhibitor used for the treatment and prophylaxis of infection with influenza viruses A (including pandemic H1N1) and B.                                                                                                                                                    |
| PENCICLOVIR         | -6.6        | -5.3        | Penciclovir is a synthetic acyclic guanine derivative with antiviral activity used for the treatment of various herpes simplex virus (HSV) infections.                                                                                                                                                                                                   |
| <b>PIBRENTASVIR</b> | <b>-7.5</b> | <b>-6.6</b> | Pibrentasvir is a direct acting antiviral agent and Hepatitis C virus (HCV) NS5A inhibitor that targets the the viral RNA replication and viron assembly. In combination with Glecaprevir, pibrentastiv is a useful therapy for patients who experienced therapeutic failure from other NS5A inhibitors.                                                 |
| REMDESIVIR          | -8          | -8.1        | Remdesivir, or GS-5734, is an adenosine triphosphate analog first described in the literature in 2016 as a potential treatment for Ebola.1 In 2017, its activity against the coronavirus family of viruses was also demonstrated.2 Remdesivir is also being researched as a potential treatment to SARS-CoV-2, the coronavirus responsible for COVID-19. |
| RIBAVIRIN           | -6.8        | -5.4        | Producing a broad-spectrum activity against several RNA and DNA viruses, Ribavirin is a synthetic guanosine nucleoside and antiviral agent that interferes with the synthesis of viral mRNA. It is primarily indicated for use in treating hepatitis C and viral hemorrhagic fevers.                                                                     |
| RILPIVIRINE         | -9.2        | -6.4        | Rilpivirine is non-nucleoside reverse transcriptase inhibitor (NNRTI) which is used for the treatment of HIV-1 infections in treatment-naive patients.                                                                                                                                                                                                   |
| RITONAVIR           | -9          | -5.8        | Ritonavir is an HIV protease inhibitor that interferes with the reproductive cycle of HIV. While ritonavir is not an active antiviral agent against hepatitis C virus (HCV) infection, it is added in combination therapies indicated for treatment of HCV infections as a booster.                                                                      |
| SAQUINAVIR          | -9.7        | -5.3        | Saquinavir is an HIV-1 protease inhibitor used in combination with ritonavir and other antiretrovirals for the treatment of human immunodeficiency virus-1 (HIV-1) infection.                                                                                                                                                                            |
| TECOVIRIMAT         | -9.3        | -6.9        | Tecovirimat is the first approved drug for smallpox                                                                                                                                                                                                                                                                                                      |
| TELAPREVIR          | -9.5        | -6.3        | Telaprevir is a direct acting antiviral medication used as part of combination therapy to treat chronic Hepatitis C, an infectious liver                                                                                                                                                                                                                 |

|                         |      |      |                                                                                                                                                                                                                                                                                                                                                                                     |
|-------------------------|------|------|-------------------------------------------------------------------------------------------------------------------------------------------------------------------------------------------------------------------------------------------------------------------------------------------------------------------------------------------------------------------------------------|
|                         |      |      | disease caused by infection with Hepatitis C Virus (HCV). HCV is a single-stranded RNA virus. Telaprevir is an inhibitor of NS3/4A, a serine protease enzyme, encoded by HCV genotype 1.                                                                                                                                                                                            |
| TENOFOVIR               | -7.1 | -5.7 | Tenofovir has been shown to be effective against HIV, herpes simplex virus-2, and hepatitis B virus.                                                                                                                                                                                                                                                                                |
| TENOFOVIR<br>DISOPROXIL | -6.5 | -5.8 | Tenofovir is indicated in combination with other antiretroviral agents for the management of HIV-1 infection in adults and pediatric patients 2 years of age and older. It is also indicated for the treatment of chronic hepatitis B in adults and pediatric patients 12 years of age and older.                                                                                   |
| VALACYCLOVIR            | -6.7 | -5.7 | Valaciclovir (valacyclovir), also known as <i>Valtrex</i> , is an antiviral drug that has been used to manage and treat various herpes infections for more than 2 decades.                                                                                                                                                                                                          |
| VALGANCICLOVIR          | -7   | -5.8 | Valganciclovir hydrochloride (Valcyte, manufactured by Roche) is an antiviral medication used to treat cytomegalovirus infections.                                                                                                                                                                                                                                                  |
| VOXILAPREVIR            | -8.7 | -6.5 | Voxilaprevir is a Direct-Acting Antiviral (DAA) medication used as part of combination therapy to treat chronic Hepatitis C, an infectious liver disease caused by infection with Hepatitis C Virus (HCV). HCV is a single-stranded RNA virus. Voxilaprevir exerts its antiviral action by reversibly binding and inhibiting the NS3/4A serine protease of Hepatitis C Virus (HCV). |
| ZANAMIVIR               | -6.6 | -5.1 | It is used for the prevention and treatment of influenza A and B.                                                                                                                                                                                                                                                                                                                   |
